# Supplementary material for: Developing a computational model that accurately reproduces the structural features of a dinucleoside monophosphate unit within B-DNA
Source: Royal Society of Chemistry journal article supplement (doi:10.1039/c1cp21689a), 2011-01-01
Supplement: c1cp21689a.pdf [file c1cp21689a.pdf]

## Developing a computational model that accurately reproduces the structural features of a dinucleoside monophosphate unit within B-DNA

*Cassandra D. M. Churchill and Stacey D. Wetmore\**

*Department of Chemistry and Biochemistry, University of Lethbridge, 4401 University Drive, Lethbridge,  
Alberta, Canada T1K 3M4*

### Electronic Supplementary Information (ESI)

#### *Table of Contents*

|                                                                                       | Page           |
|---------------------------------------------------------------------------------------|----------------|
| Optimized structures for modified sequences                                           |                |
| Figure ESI-1 to ESI-3: 5'-GU-3'                                                       | ESI-2 to ESI-4 |
| Figure ESI-4 to ESI-6: 5'-G <sup>Br</sup> U-3'                                        | ESI-5 to ESI-7 |
| Backbone torsion angles for all computational model, method and sequence combinations |                |
| Table ESI-1: 5'-GT-3'                                                                 | ESI-8          |
| Table ESI-2: 5'-GU-3'                                                                 | ESI-9          |
| Table ESI-3: 5'-G <sup>Br</sup> U-3'                                                  | ESI-10         |
| Basis Set Effects                                                                     |                |
| Table ESI-4: 6-31G(d,p) vs. 6-31+G(d,p) with an anionic phosphate                     | ESI-11         |

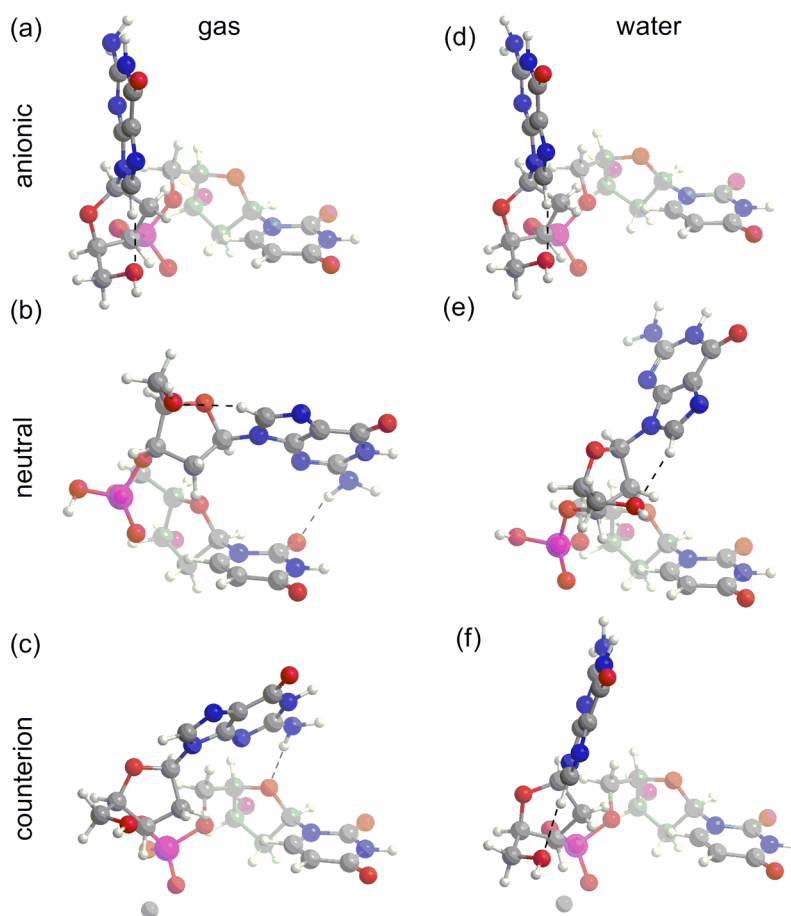

Figure ESI-1: B3LYP structures of the 5'-GU-3' dinucleoside monophosphate sequence optimized in the gas phase (a-c) and water (d-f) using the anionic (a,d), neutral (b,e) and counterion (c,f) phosphate models.

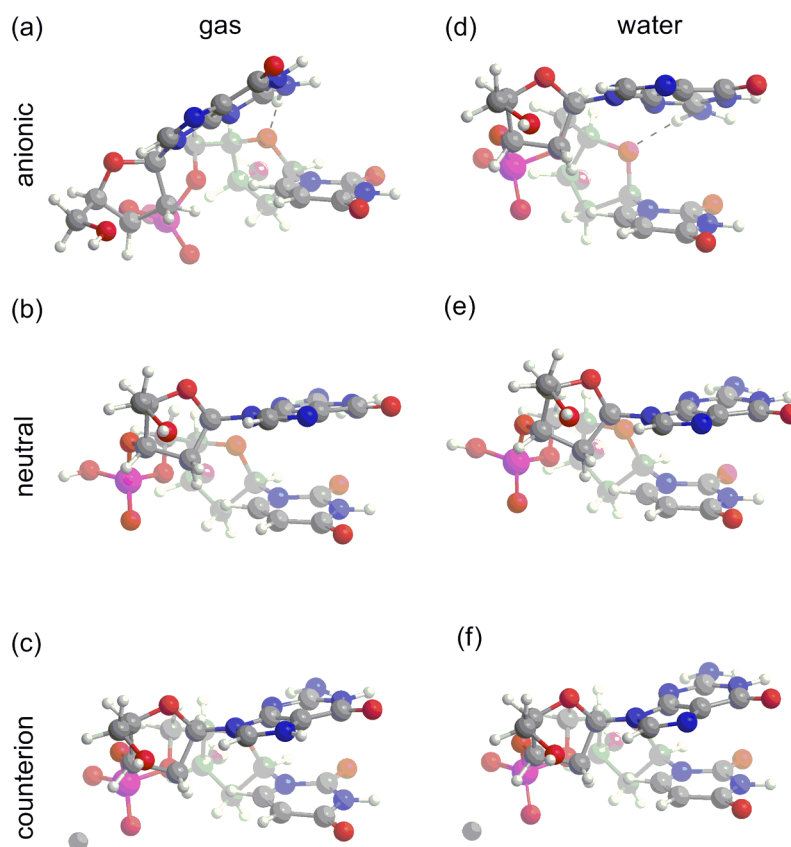

Figure ESI-2: MPWB1K structures of the 5'-GU-3' dinucleoside monophosphate sequence optimized in the gas phase (a-c) and water (d-f) using the anionic (a,d), neutral (b,e) and counterion (c,f) phosphate models.

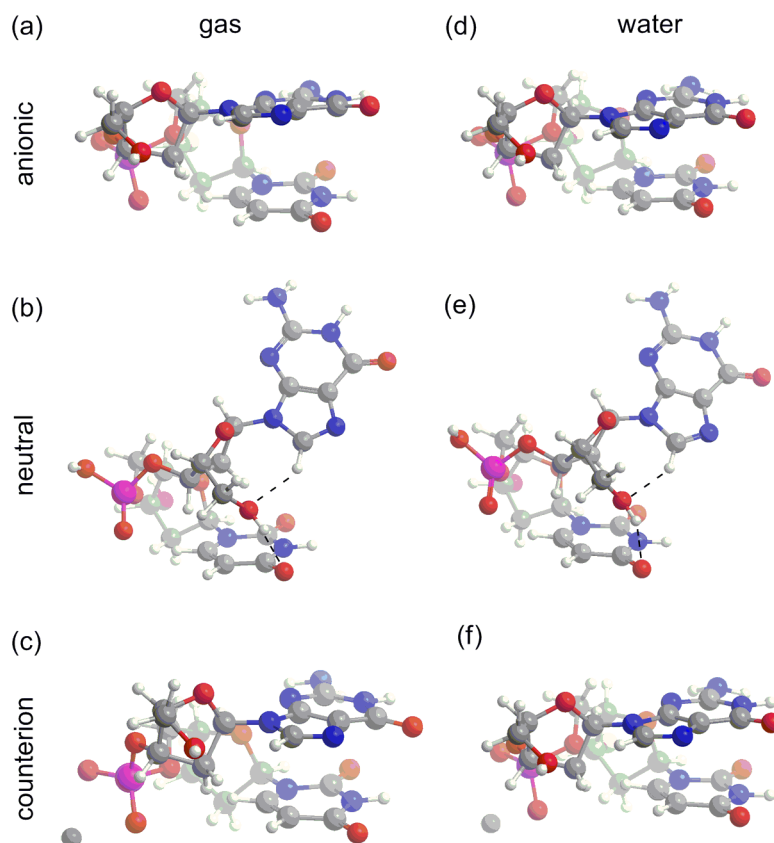

Figure ESI-3: M06-2X structures of the 5'-GU-3' dinucleoside monophosphate sequence optimized in the gas phase (a-c) and water (d-f) using the anionic (a,d), neutral (b,e) and counterion (c,f) phosphate models.

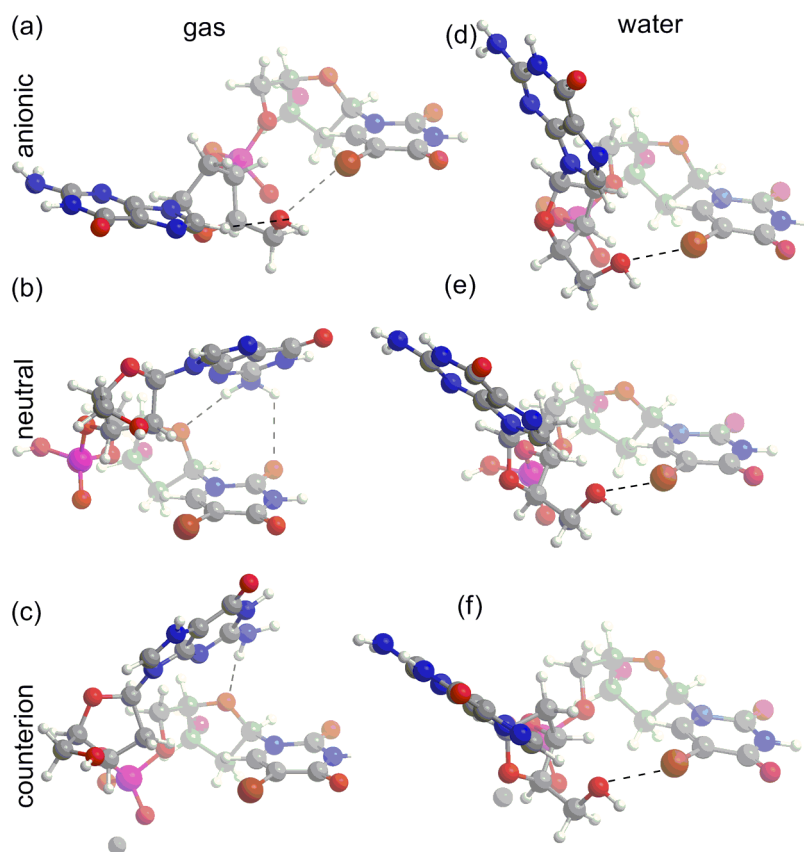

Figure ESI-4: B3LYP structures of the 5'-G<sup>Br</sup>U-3' dinucleoside monophosphate sequence optimized in the gas phase (a-c) and water (d-f) using the anionic (a,d), neutral (b,e) and counterion (c,f) phosphate models.

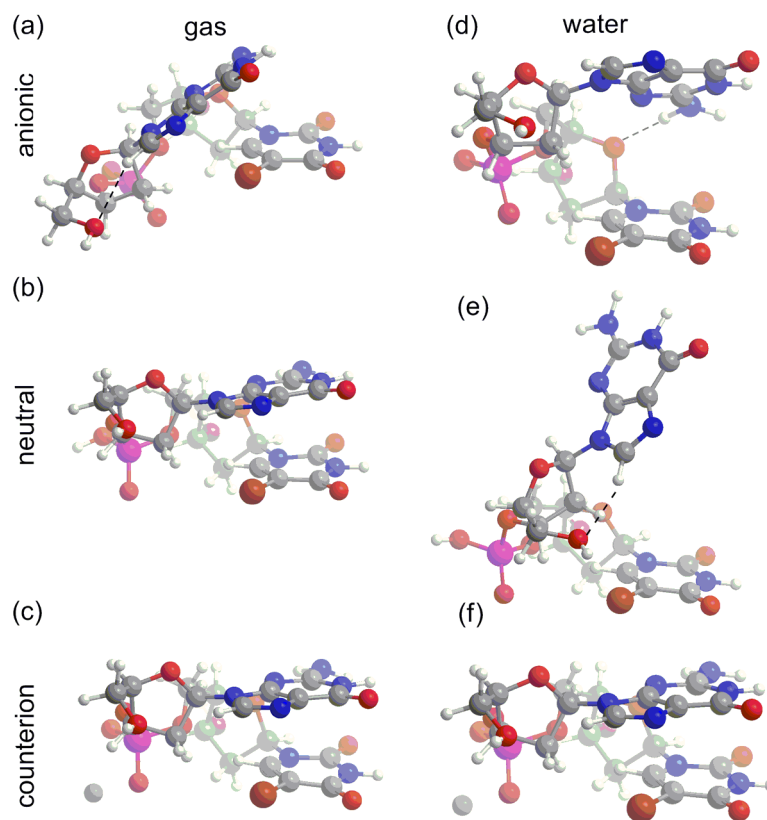

Figure ESI-5: MPWB1K structures of the 5'-G<sup>Br</sup>U-3' dinucleoside monophosphate sequence optimized in the gas phase (a-c) and water (d-f) using the anionic (a,d), neutral (b,e) and counterion (c,f) phosphate models.

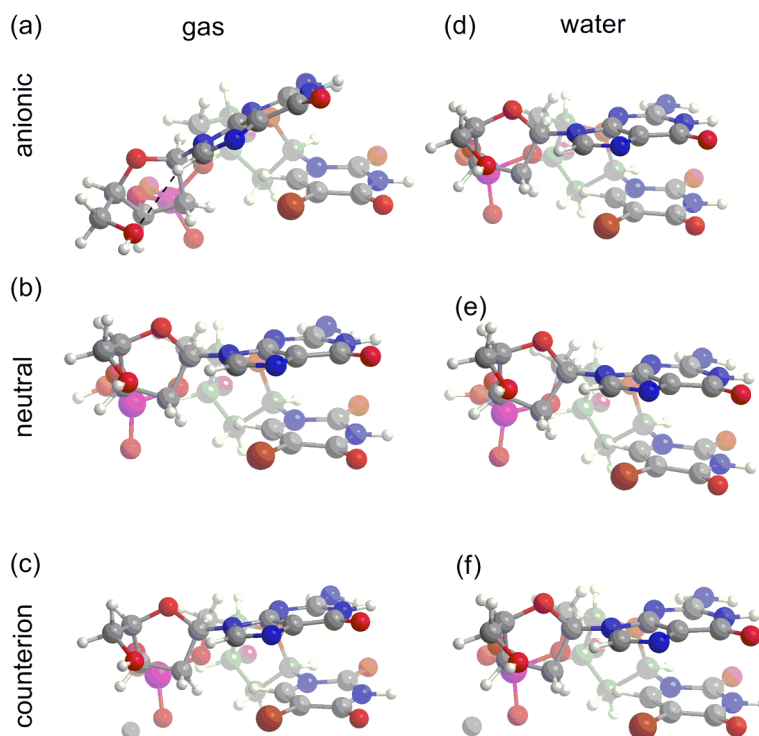

Figure ESI-6: M06-2X structures of the 5'-G<sup>Br</sup>U-3' dinucleoside monophosphate sequence optimized in the gas phase (a-c) and water (d-f) using the anionic (a,d), neutral (b,e) and counterion (c,f) phosphate models.

Table ESI-1: Backbone torsion angles ( $^{\circ}$ ) and pseudorotation phase angles (P,  $^{\circ}$ ) of the 5'-GT-3' sequence calculated in the gas-phase and water, as well as the average value (Exp.) and standard deviation (SD) obtained from experiment.

| Gas           | Anionic |        |        | Neutral |        |        | Counterion |                     |        | Exp. <sup>b</sup>    | SD <sup>b</sup> |
|---------------|---------|--------|--------|---------|--------|--------|------------|---------------------|--------|----------------------|-----------------|
|               | B3LYP   | MPWB1K | M06-2X | B3LYP   | MPWB1K | M06-2X | B3LYP      | MPWB1K <sup>d</sup> | M06-2X |                      |                 |
| $\chi^a$      |         |        |        |         |        |        |            |                     |        |                      |                 |
| $\chi_{5'}$   | 232.0   | 201.3  | 210.3  | 195.3   | 237.9  | 244.9  | 200.7      | 236.7               | 236.8  | 258                  | 14              |
| $\delta_{5'}$ | 145.4   | 147.5  | 148.1  | 143.4   | 147.0  | 146.1  | 143.9      | 146.8               | 147.2  | 128                  | 13              |
| $\epsilon$    | 201.8   | 167.5  | 161.9  | 193.7   | 197.6  | 224.1  | 182.2      | 160.1               | 170.6  | 184                  | 11              |
| $\zeta$       | 277.6   | 278.3  | 279.0  | 261.7   | 173.9  | 275.7  | 278.8      | 272.7               | 264.9  | 265                  | 10              |
| $\alpha$      | 261.0   | 268.6  | 271.3  | 314.8   | 23.2   | 310.4  | 295.4      | 285.5               | 295.1  | 298                  | 15              |
| $\beta$       | 260.0   | 247.5  | 250.5  | 185.8   | 84.5   | 152.6  | 229.3      | 221.6               | 197.2  | 176                  | 9               |
| $\gamma$      | 64.6    | 59.8   | 56.1   | 55.3    | 51.3   | 56.8   | 51.9       | 49.7                | 54.5   | 48                   | 11              |
| $\chi_{3'}$   | 251.3   | 273.7  | 277.9  | 262.4   | 250.6  | 268.5  | 240.3      | 255.0               | 257.9  | 241                  | 8               |
| $\delta_{3'}$ | 145.4   | 153.7  | 155.4  | 148.3   | 126.8  | 151.9  | 145.7      | 148.1               | 149.8  | 128                  | 13              |
| P5'           | 172.2   | 164.8  | 165.7  | 160.8   | 173.5  | 174.3  | 158.7      | 165.7               | 165.9  | 144-190 <sup>c</sup> |                 |
| P3'           | 171.1   | 189.5  | 199.5  | 171.9   | 127.3  | 170.7  | 166.6      | 164.3               | 171.2  | 144-190 <sup>c</sup> |                 |

| Water         | Anionic |        |        | Neutral |        |        | Counterion |                     |        | Exp. <sup>b</sup>    | SD <sup>b</sup> |
|---------------|---------|--------|--------|---------|--------|--------|------------|---------------------|--------|----------------------|-----------------|
|               | B3LYP   | MPWB1K | M06-2X | B3LYP   | MPWB1K | M06-2X | B3LYP      | MPWB1K <sup>d</sup> | M06-2X |                      |                 |
| $\chi^a$      |         |        |        |         |        |        |            |                     |        |                      |                 |
| $\chi_{5'}$   | 237.3   | 210.4  | 227.2  | 238.1   | 241.2  | 241.3  | 236.8      | 234.5               | 230.0  | 258                  | 14              |
| $\delta_{5'}$ | 147.0   | 150.1  | 149.8  | 146.2   | 147.2  | 145.7  | 147.2      | 150.8               | 149.8  | 128                  | 13              |
| $\epsilon$    | 203.3   | 162.8  | 158.0  | 220.7   | 187.1  | 217.4  | 203.8      | 172.0               | 155.8  | 184                  | 11              |
| $\zeta$       | 279.5   | 277.0  | 276.8  | 264.4   | 218.0  | 280.2  | 281.0      | 266.7               | 277.2  | 265                  | 10              |
| $\alpha$      | 284.3   | 271.5  | 274.6  | 315.5   | 323.8  | 304.1  | 281.3      | 284.4               | 274.4  | 298                  | 15              |
| $\beta$       | 242.3   | 244.3  | 240.7  | 157.0   | 150.3  | 159.2  | 237.8      | 209.7               | 236.8  | 176                  | 9               |
| $\gamma$      | 59.8    | 60.5   | 48.0   | 58.2    | 60.3   | 57.4   | 54.7       | 50.6                | 50.2   | 48                   | 11              |
| $\chi_{3'}$   | 242.6   | 273.0  | 265.0  | 246.8   | 249.0  | 273.8  | 233.7      | 248.6               | 263.8  | 241                  | 8               |
| $\delta_{3'}$ | 146.8   | 155.1  | 154.0  | 143.7   | 147.0  | 154.5  | 147.1      | 146.6               | 152.5  | 128                  | 13              |
| P5'           | 177.8   | 170.1  | 170.6  | 177.6   | 176.8  | 174.8  | 178.4      | 170.8               | 172.6  | 144-190 <sup>c</sup> |                 |
| P3'           | 170.1   | 184.1  | 178.7  | 159.1   | 158.3  | 179.9  | 167.1      | 157.7               | 172.8  | 144-190 <sup>c</sup> |                 |

<sup>a</sup>See Figure 2 for definitions of backbone torsion angles. <sup>b</sup>See Ref. 113. <sup>c</sup>See Ref. 72. <sup>d</sup>Due to SCF convergence issues, structures were obtained using M06-2X-optimized structures as input rather than the standard HyperChem-generated structures.



Table ESI-2: Backbone torsion angles ( $^{\circ}$ ) and pseudorotation phase angles (P,  $^{\circ}$ ) of the 5'-GU-3' sequence calculated in the gas-phase and water, as well as the average value (Exp.) and standard deviation (SD) obtained from experiment.

| Gas           | Anionic |        |        | Neutral |        |        | Counterion |                     |        | Exp. <sup>b</sup>    | SD <sup>b</sup> |
|---------------|---------|--------|--------|---------|--------|--------|------------|---------------------|--------|----------------------|-----------------|
|               | B3LYP   | MPWB1K | M06-2X | B3LYP   | MPWB1K | M06-2X | B3LYP      | MPWB1K <sup>d</sup> | M06-2X |                      |                 |
| $\chi^a$      |         |        |        |         |        |        |            |                     |        |                      |                 |
| $\chi_{5'}$   | 232.2   | 209.1  | 217.3  | 241.5   | 236.8  | 58.4   | 201.3      | 237.0               | 239.0  | 258                  | 14              |
| $\delta_{5'}$ | 146.0   | 149.6  | 147.7  | 147.3   | 149.0  | 144.0  | 144.2      | 147.8               | 149.3  | 128                  | 13              |
| $\epsilon$    | 206.9   | 165.8  | 157.2  | 195.2   | 173.0  | 223.2  | 182.1      | 168.4               | 170.1  | 184                  | 11              |
| $\zeta$       | 280.1   | 274.7  | 278.1  | 181.6   | 253.2  | 275.9  | 278.9      | 266.0               | 265.5  | 265                  | 10              |
| $\alpha$      | 250.1   | 264.8  | 265.9  | 27.4    | 304.0  | 309.8  | 294.8      | 291.3               | 291.2  | 298                  | 15              |
| $\beta$       | 264.2   | 254.3  | 253.0  | 88.1    | 190.7  | 154.8  | 230.2      | 206.5               | 199.5  | 176                  | 9               |
| $\gamma$      | 64.2    | 54.2   | 53.7   | 51.2    | 53.5   | 57.2   | 51.3       | 51.8                | 52.5   | 48                   | 11              |
| $\chi_{3'}$   | 252.4   | 232.6  | 277.4  | 246.5   | 250.6  | 269.8  | 237.4      | 247.6               | 254.8  | 241                  | 8               |
| $\delta_{3'}$ | 146.6   | 151.8  | 155.6  | 119.1   | 147.7  | 152.3  | 146.0      | 149.2               | 149.7  | 128                  | 13              |
| P5'           | 172.7   | 164.5  | 164.4  | 180.2   | 168.6  | 173.1  | 159.1      | 169.0               | 169.2  | 140-190 <sup>c</sup> |                 |
| P3'           | 170.8   | 170.3  | 196.6  | 121.2   | 165.4  | 172.7  | 166.5      | 168.0               | 172.5  | 144-190 <sup>c</sup> |                 |

| Water         | Anionic |        |        | Neutral |        |        | Counterion |        |        | Exp. <sup>b</sup>    | SD <sup>b</sup> |
|---------------|---------|--------|--------|---------|--------|--------|------------|--------|--------|----------------------|-----------------|
|               | B3LYP   | MPWB1K | M06-2X | B3LYP   | MPWB1K | M06-2X | B3LYP      | MPWB1K | M06-2X |                      |                 |
| $\chi^a$      |         |        |        |         |        |        |            |        |        |                      |                 |
| $\chi_{5'}$   | 239.6   | 216.3  | 226.7  | 237.8   | 250.7  | 242.8  | 237.2      | 237.1  | 229.6  | 258                  | 14              |
| $\delta_{5'}$ | 147.7   | 150.8  | 149.9  | 212.8   | 149.9  | 145.9  | 146.7      | 151.3  | 149.6  | 128                  | 13              |
| $\epsilon$    | 206.8   | 161.3  | 154.8  | 219.2   | 171.4  | 216.5  | 199.3      | 171.7  | 155.8  | 184                  | 11              |
| $\zeta$       | 284.0   | 277.2  | 277.6  | 263.3   | 249.9  | 280.0  | 278.3      | 265.0  | 277.1  | 265                  | 10              |
| $\alpha$      | 276.9   | 269.0  | 267.1  | 315.0   | 179.7  | 304.2  | 284.4      | 287.2  | 272.0  | 298                  | 15              |
| $\beta$       | 243.4   | 245.6  | 246.5  | 162.1   | 181.4  | 160.0  | 238.0      | 205.6  | 236.2  | 176                  | 9               |
| $\gamma$      | 55.2    | 57.7   | 52.8   | 58.0    | 55.1   | 57.2   | 54.0       | 53.3   | 51.7   | 48                   | 11              |
| $\chi_{3'}$   | 234.9   | 273.7  | 274.2  | 243.2   | 246.6  | 275.6  | 233.7      | 245.7  | 259.8  | 241                  | 8               |
| $\delta_{3'}$ | 148.3   | 155.4  | 155.8  | 144.3   | 147.6  | 154.9  | 146.8      | 149.5  | 152.5  | 128                  | 13              |
| P5'           | 178.7   | 171.9  | 171.7  | 178.0   | 180.0  | 174.0  | 178.1      | 173.5  | 172.8  | 144-190 <sup>c</sup> |                 |
| P3'           | 170.2   | 187.9  | 189.2  | 160.0   | 160.1  | 180.7  | 166.9      | 167.9  | 176.8  | 144-190 <sup>c</sup> |                 |

<sup>a</sup>See Figure 2 for definitions of backbone torsion angles. <sup>b</sup>See Ref. 113. <sup>c</sup>See Ref. 72. <sup>d</sup>Due to SCF convergence issues, structures were obtained using M06-2X-optimized structures as input rather than the standard HyperChem-generated structures.

Table ESI-3: Backbone torsion angles ( $^{\circ}$ ) and pseudorotation phase angles ( $P$ ,  $^{\circ}$ ) of the 5'-G<sup>Br</sup>U-3' sequence calculated in the gas-phase and water, as well as the average value (Exp.) and standard deviation (SD) obtained from experiment.

| Gas         | Anionic |        |        | Neutral |        |        | Counterion |        |        | Exp. <sup>b</sup>    | SD <sup>b</sup> |
|-------------|---------|--------|--------|---------|--------|--------|------------|--------|--------|----------------------|-----------------|
|             | B3LYP   | MPWB1K | M06-2X | B3LYP   | MPWB1K | M06-2X | B3LYP      | MPWB1K | M06-2X |                      |                 |
| $\chi^a$    | 230.5   | 212.1  | 210.7  | 196.8   | 233.6  | 231.2  | 206.8      | 229.2  | 228.5  | 258                  | 14              |
| $\delta 5'$ | 144.5   | 150.7  | 150.6  | 144.2   | 149.2  | 149.6  | 145.3      | 146.4  | 147.0  | 128                  | 13              |
| $\epsilon$  | 278.0   | 165.8  | 162.4  | 195.1   | 160.8  | 158.2  | 179.8      | 160.3  | 154.3  | 184                  | 11              |
| $\zeta$     | 286.7   | 275.7  | 278.0  | 265.0   | 266.1  | 269.2  | 276.9      | 273.1  | 278.1  | 265                  | 10              |
| $\alpha$    | 251.1   | 268.9  | 267.0  | 308.6   | 293.8  | 292.2  | 293.4      | 283.7  | 280.0  | 298                  | 15              |
| $\beta$     | 260.9   | 253.4  | 256.7  | 188.1   | 221.2  | 226.5  | 230.1      | 230.6  | 239.0  | 176                  | 9               |
| $\gamma$    | 57.6    | 52.4   | 52.1   | 52.1    | 45.3   | 44.4   | 51.8       | 47.1   | 47.0   | 48                   | 11              |
| $\chi 3'$   | 238.8   | 233.0  | 240.6  | 261.3   | 256.5  | 258.6  | 238.6      | 257.7  | 260.4  | 241                  | 8               |
| $\delta 3'$ | 148.5   | 152.5  | 154.7  | 148.3   | 150.6  | 151.7  | 147.1      | 151.1  | 153.1  | 128                  | 13              |
| $P 5'$      | 169.5   | 166.6  | 167.8  | 162.3   | 167.4  | 168.4  | 160.9      | 162.9  | 165.9  | 144-190 <sup>c</sup> |                 |
| $P 3'$      | 177.3   | 170.3  | 173.9  | 172.7   | 168.3  | 171.7  | 172.2      | 171.9  | 175.3  | 144-190 <sup>c</sup> |                 |

| Water       | Anionic |        |        | Neutral |        |        | Counterion |                     |        | Exp. <sup>b</sup>    | SD <sup>b</sup> |
|-------------|---------|--------|--------|---------|--------|--------|------------|---------------------|--------|----------------------|-----------------|
|             | B3LYP   | MPWB1K | M06-2X | B3LYP   | MPWB1K | M06-2X | B3LYP      | MPWB1K <sup>d</sup> | M06-2X |                      |                 |
| $\chi^a$    | 238.0   | 202.1  | 227.3  | 237.5   | 236.7  | 232.9  | 237.5      | 229.8               | 227.7  | 258                  | 14              |
| $\delta 5'$ | 145.6   | 151.7  | 150.2  | 147.0   | 146.1  | 151.8  | 149.0      | 149.5               | 150.1  | 128                  | 13              |
| $\epsilon$  | 219.0   | 166.2  | 202.8  | 276.1   | 215.3  | 161.1  | 275.6      | 162.5               | 157.2  | 184                  | 11              |
| $\zeta$     | 298.4   | 279.6  | 276.6  | 270.8   | 273.0  | 265.7  | 286.8      | 271.8               | 276.6  | 265                  | 10              |
| $\alpha$    | 253.4   | 268.6  | 276.4  | 301.6   | 304.5  | 295.1  | 277.6      | 280.4               | 277.6  | 298                  | 15              |
| $\beta$     | 249.5   | 245.4  | 242.3  | 192.5   | 176.2  | 217.4  | 222.2      | 227.3               | 238.1  | 176                  | 9               |
| $\gamma$    | 58.0    | 60.2   | 47.2   | 50.7    | 55.7   | 47.3   | 53.1       | 50.2                | 48.0   | 48                   | 11              |
| $\chi 3'$   | 238.7   | 272.7  | 260.3  | 225.6   | 237.1  | 253.1  | 231.9      | 252.4               | 258.5  | 241                  | 8               |
| $\delta 3'$ | 149.5   | 154.9  | 153.8  | 146.9   | 147.7  | 150.4  | 148.3      | 149.9               | 152.7  | 128                  | 13              |
| $P 5'$      | 176.6   | 172.2  | 170.4  | 176.0   | 170.9  | 172.2  | 178.5      | 170.0               | 171.3  | 144-190 <sup>c</sup> |                 |
| $P 3'$      | 174.4   | 180.6  | 176.7  | 167.3   | 157.8  | 167.0  | 173.0      | 166.2               | 173.5  | 144-190 <sup>c</sup> |                 |

<sup>a</sup>See Figure 2 for definitions of backbone torsion angles. <sup>b</sup>See Ref. 113. <sup>c</sup>See Ref. 72. <sup>d</sup>Due to SCF convergence issues, structures were obtained using M06-2X-optimized structures as input rather than the standard HyperChem-generated structures.

Table ESI-4: Comparison of the 6-31G(d,p) and 6-31+G(d,p) backbone torsion angles ( $^{\circ}$ ), pseudorotation phase angles ( $P$ ,  $^{\circ}$ ) and the angle between nucleobase planes ( $\varphi$ ,  $^{\circ}$ ) for the 5'-GT-3' sequence calculated in the gas-phase and water with M06-2X for the anionic and counterion phosphate models, as well as the average value (Exp.) and standard deviation (SD) obtained from experiment.

|                          | Anionic     |       |            |       | Counterion  |       |            |       | Exp. <sup>b</sup>    | SD <sup>b</sup> |
|--------------------------|-------------|-------|------------|-------|-------------|-------|------------|-------|----------------------|-----------------|
|                          | 6-31+G(d,p) |       | 6-31G(d,p) |       | 6-31+G(d,p) |       | 6-31G(d,p) |       |                      |                 |
|                          | Gas         | Water | Gas        | Water | Gas         | Water | Gas        | Water |                      |                 |
| $\chi_{5'}$ <sup>a</sup> | 201.7       | 233.9 | 210.7      | 227.3 | 238.3       | 260.5 | 228.5      | 227.7 | 258                  | 14              |
| $\delta_{5'}$            | 146.1       | 149.5 | 150.6      | 150.2 | 146.7       | 147.5 | 147.0      | 150.1 | 128                  | 13              |
| $\epsilon$               | 167.2       | 162.6 | 162.4      | 202.8 | 154.4       | 160.3 | 154.3      | 157.2 | 184                  | 11              |
| $\zeta$                  | 279.4       | 272.6 | 278.0      | 276.6 | 276.7       | 268.3 | 278.1      | 276.6 | 265                  | 10              |
| $\alpha$                 | 272.1       | 283.5 | 267.0      | 276.4 | 283.1       | 300.1 | 280.0      | 277.6 | 298                  | 15              |
| $\beta$                  | 249.4       | 223.5 | 256.7      | 242.3 | 230.7       | 188.3 | 239.0      | 238.1 | 176                  | 9               |
| $\gamma$                 | 56.2        | 49.1  | 52.1       | 47.2  | 46.7        | 55.8  | 47.0       | 48.0  | 48                   | 11              |
| $\chi_{3'}$              | 279.1       | 254.3 | 240.6      | 260.3 | 257.9       | 251.5 | 260.4      | 258.5 | 241                  | 8               |
| $\delta_{3'}$            | 154.2       | 149.4 | 154.7      | 153.8 | 150.2       | 146.0 | 153.1      | 152.7 | 128                  | 13              |
| P5'                      | 163.1       | 173.2 | 167.8      | 170.4 | 168.4       | 189.3 | 165.9      | 171.3 | 144–190 <sup>c</sup> |                 |
| P3'                      | 198.5       | 168.9 | 173.9      | 176.7 | 170.9       | 160.9 | 175.3      | 173.5 | 144–190 <sup>c</sup> |                 |
| $\varphi$                | 32.1        | 6.1   | 28.8       | 4.9   | 11.6        | 6.8   | 12.9       | 4.7   | –                    |                 |

<sup>a</sup>See Figure 2 for definitions of backbone torsion angles. <sup>b</sup>See Ref. 113. <sup>c</sup>See Ref. 72.
